# Supplementary material for: Effects of optical and magnetic fields on the electrical characteristics of colloidal graphene quantum dots
Source: Royal Society of Chemistry journal article supplement (doi:10.1039/c6ra03205b), 2016-01-01
Supplement: c6ra03205b1.pdf [file c6ra03205b1.pdf]

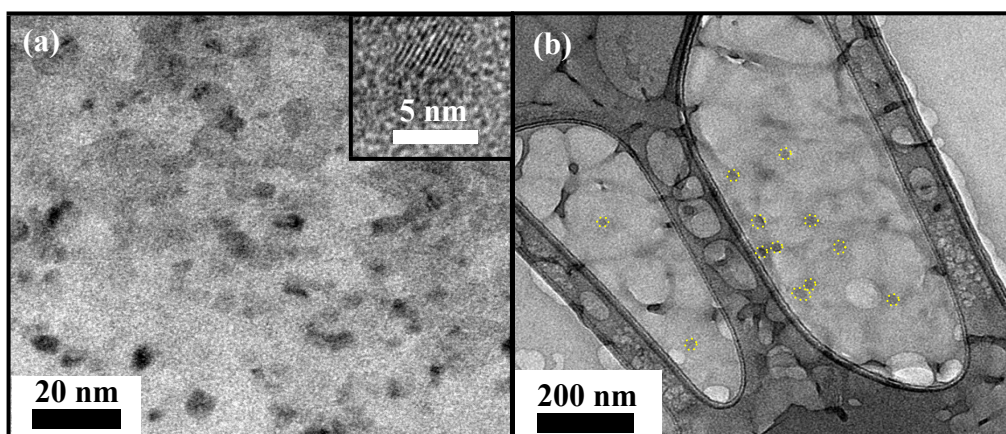

Fig. S1 TEM images of (a) GQD1 prepared by 17 mins of microwave heating time and (b) GQD4 that was prepared by providing 23 mins of microwave heating.

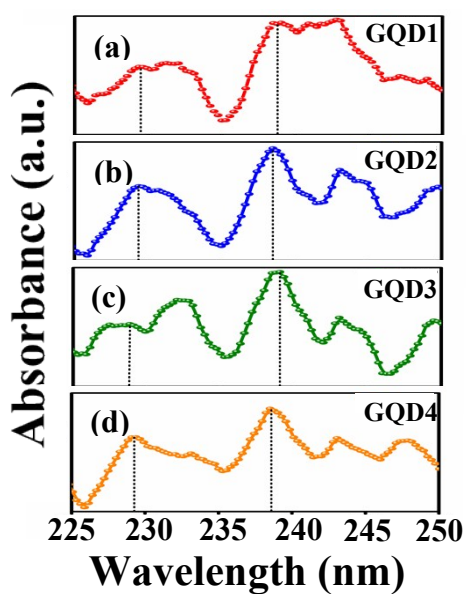

Fig. S2 UV-vis absorption spectra of (a) GQD1, (b) GQD2, (c) GQD3 and (d) GQD4 showing the existence of C=C in the graphene quantum dots.
